# Supplementary material for: Improved methods and resources for paramecium genomics: transcription units, gene annotation and gene expression
Source: PubMed Central journal article supplement (PMC5485702; doi:10.1186/s12864-017-3887-z), 2017-06-26
Supplement: 12864_2017_3887_MOESM2_ESM.pdf [file 12864_2017_3887_MOESM2_ESM.pdf]

**Fig. S1. Comparison of the sizes of *P. tetraurelia* transcription units and genes.**

The two distributions are very similar, illustrating the good quality of the predicted transcription units. The gene sizes for this analysis are the v1 gene annotations [1].

**Fig. S2. Intron size distributions.** The first column shows the size distributions of all introns for each of the 4 species. The sizes are shown modulus 3 (3n introns, black; 3n+1, red; 3n+2 green). The middle column shows the same curves, but only for introns that do not contain an in-frame stop codon. The last column shows only introns that do contain an in-frame stop codon. As previously observed for *P. tetraurelia* [2], the three curves are superposed for stop-containing introns, however there are significantly fewer stopless introns of length 3n, consistent with the hypothesis that 3n stopless introns have been counter-selected during evolution.

**Fig. S3. Autogamy time-course experiments.** The top part of the figure shows barplots of the cytology of RNA samples that were subjected to RNA-Seq analysis and indicates how the 15 RNA-Seq samples have been grouped into 6 groups of biological replicates (Veg, Mei, Frg, Dev1, Dev2\_3, Dev4) for differential expression analysis (Table S1). Different stages of autogamy are pictured beneath the barplots. The nuclear features used for classification of a population of 100 cells are indicated in colors. When vegetative cells (**V**) enter the sexual process of autogamy (i) the two genetically identical micronuclei undergo meiosis (**M**) ; (ii) 7 of the 8 haploid products are destroyed and the remaining haploid nucleus is copied by mitosis; (iii) two haploid gametic nuclei fuse to form a diploid zygotic nucleus and the maternal MAC begins to unwind taking on the appearance of a skein (**S**); (iv) the zygotic nucleus divides twice by mitosis to yield 4 products, two become new MICs and 2 develop into new MACs. The maternal MAC breaks up into about 30 fragments (**F**); (v) during development, the new MACs (**NM**) undergo endoreplication and elimination of repeated sequences and of single-copy Internal Eliminated Sequences (IES) and (vi) at the

end of MAC development, the new vegetative cycle begins with a karyonidal division (**K**), so-called because the new MACs, still undergoing endoreplication to achieve 800n, do not divide but are distributed to the daughter cells.

**Fig.S4. Anti-sense transcription.** *P. tetraurelia* polyA+ mRNA-Seq data from all samples were pooled. For each *P. tetraurelia* v2 protein-coding gene model covered by more than 10 RNA-Seq fragments, the percentage in anti-sense orientation was calculated. A. Histogram of genes according to the percentage of anti-sense fragments. Genes with less than 1% anti-sense transcription = 31,165 genes (first bar of the histogram, 80% of the genes used for the analysis). B. Dotplot of gene expression level (number of mapped fragments divided by gene length) as a function of the percentage of anti-sense fragments for that gene. The vast majority of genes have no or only a few anti-sense transcripts, suggesting transcriptional noise. A few genes have a very high percentage of anti-sense fragments and probably correspond to annotation errors. Further experiments will be required to determine whether any of the anti-sense transcription we observe has functional significance. At least some of the anti-sense transcription may arise from known vegetative and zygotic genome-wide non-coding transcription necessary for genome rearrangements. [3,4]

**Fig. S5. Hierarchical clustering of differentially expressed genes.** The heatmaps (generated using the R ‘heatmap.2’ method) show all differentially expressed genes after hierarchical clustering. The colors in the heatmaps vary from dark blue to dark red according to log<sub>2</sub> normalized gene expression level (Color key, to the right of the heatmaps). The columns of the heatmaps correspond to the RNA-Seq samples and the rows correspond to the differentially expressed genes. The gray boxes below the sample dendrogram show the biological replicates used in the differential gene expression analysis. a. Genes that are induced during autogamy. Four gene clusters were retained, indicated by the colored bars to the right of the gene dendrogram, from top to bottom: blue, Intermediate peak; red, Late peak;

purple, Early peak and green, Late induction. b. Genes that are repressed during autogamy. Two gene clusters were retained, as indicated by the solid bars to the right of the gene dendrogram: pink, Late repression; orange, Early repression.

**Fig. S6. Autogamy co-expression clusters.** Each graph shows a boxplot of the normalized expression (using the mean expression value of each gene across the biological replicates for each of the 6 stages of the time-course) of the genes in the cluster. The superimposed colored curve gives the mean normalized gene expression. The colors are the same as in Fig. S4.

**Fig. S7. Paralog discrimination by microarrays and RNA-Seq.** Analyses involved 9402 pairs of paralogs (*P. tetraurelia* v1 annotation) issued from the recent WGD and whose lengths differ by less than 10% (to avoid possible pseudogenes or annotation errors). We define expression level divergence for each pair of paralogs as the absolute difference between log-transformed mean expression levels for Vegetative points, after normalization (comparable results were obtained using mean expression levels for each of the autogamy stages). The expression level divergence was calculated for both the previously published microarray data and the RNA-seq data. **a.** Boxplots of the paralog expression level divergence, as a function of nucleotide identity of the paralogs, for both the microarray and the RNA-Seq data. **b.** Scatter plot of the microarray (x-axis) and the RNA-seq (y-axis) paralog expression level divergence for all the pairs of paralogs. The dotted blue line is the linear model that best fits the data. The text inside the plot gives the adjusted  $R^2$  coefficient of the linear regression ( $R^2 = 0.4$ , indicating a correlation) and the p-value. **c.** Stacked histogram of the absolute difference in paralog expression level divergence between microarray and RNA-seq measurements, as a function of nucleotide identity of paralog pairs, showing that the higher the nucleotide identity, the smaller the difference between RNA-seq and microarray paralog divergence measurements. **d.** Scatter plot of the microarray (x-axis) and

the RNA-seq (y-axis) paralog expression level divergence of the paralog pairs that share at least 95% nucleotide identity. The RNA-seq and microarray paralog expression level divergence measurements are no longer correlated ( $R^2 = 0.015$ ). **e.** Stacked histogram showing that expression level of paralogs tends to increase with increased nucleotide identity between paralogs. **f.** Stacked histogram showing that GC content of paralogs tends to increase with increased nucleotide identity between paralogs.

**Fig. S8. Word cloud analysis of biological processes in clusters.** Word clouds were drawn for the words in GO Biological Process terms associated with the genes in each cluster, weighted for enrichment of the word (cf. Methods). **a.** Early peak. **b.** Intermediate Peak. **c.** Late peak. **d.** Late induction. **e.** Early repression. **f.** Late repression.

#### **Literature cited in Supplementary Figure legends**

1. Aury J-M, Jaillon O, Duret L, Noel B, Jubin C, Porcel BM, et al. Global trends of whole-genome duplications revealed by the ciliate *Paramecium tetraurelia*. *Nature*. 2006;444:171–8.
2. Jaillon O, Bouhouche K, Gout J-F, Aury J-M, Noel B, Saudemont B, et al. Translational control of intron splicing in eukaryotes. *Nature*. 2008;451:359–62.
3. Lepère G, Bétermier M, Meyer E, Duharcourt S. Maternal noncoding transcripts antagonize the targeting of DNA elimination by scanRNAs in *Paramecium tetraurelia*. *Genes Dev*. 2008;22:1501–12.
4. Maliszewska-Olejniczak K, Gruchota J, Gromadka R, Denby Wilkes C, Arnaiz O, Mathy N, et al. TFIIS-Dependent Non-coding Transcription Regulates Developmental Genome Rearrangements. *PLoS Genet*. 2015;11:e1005383.



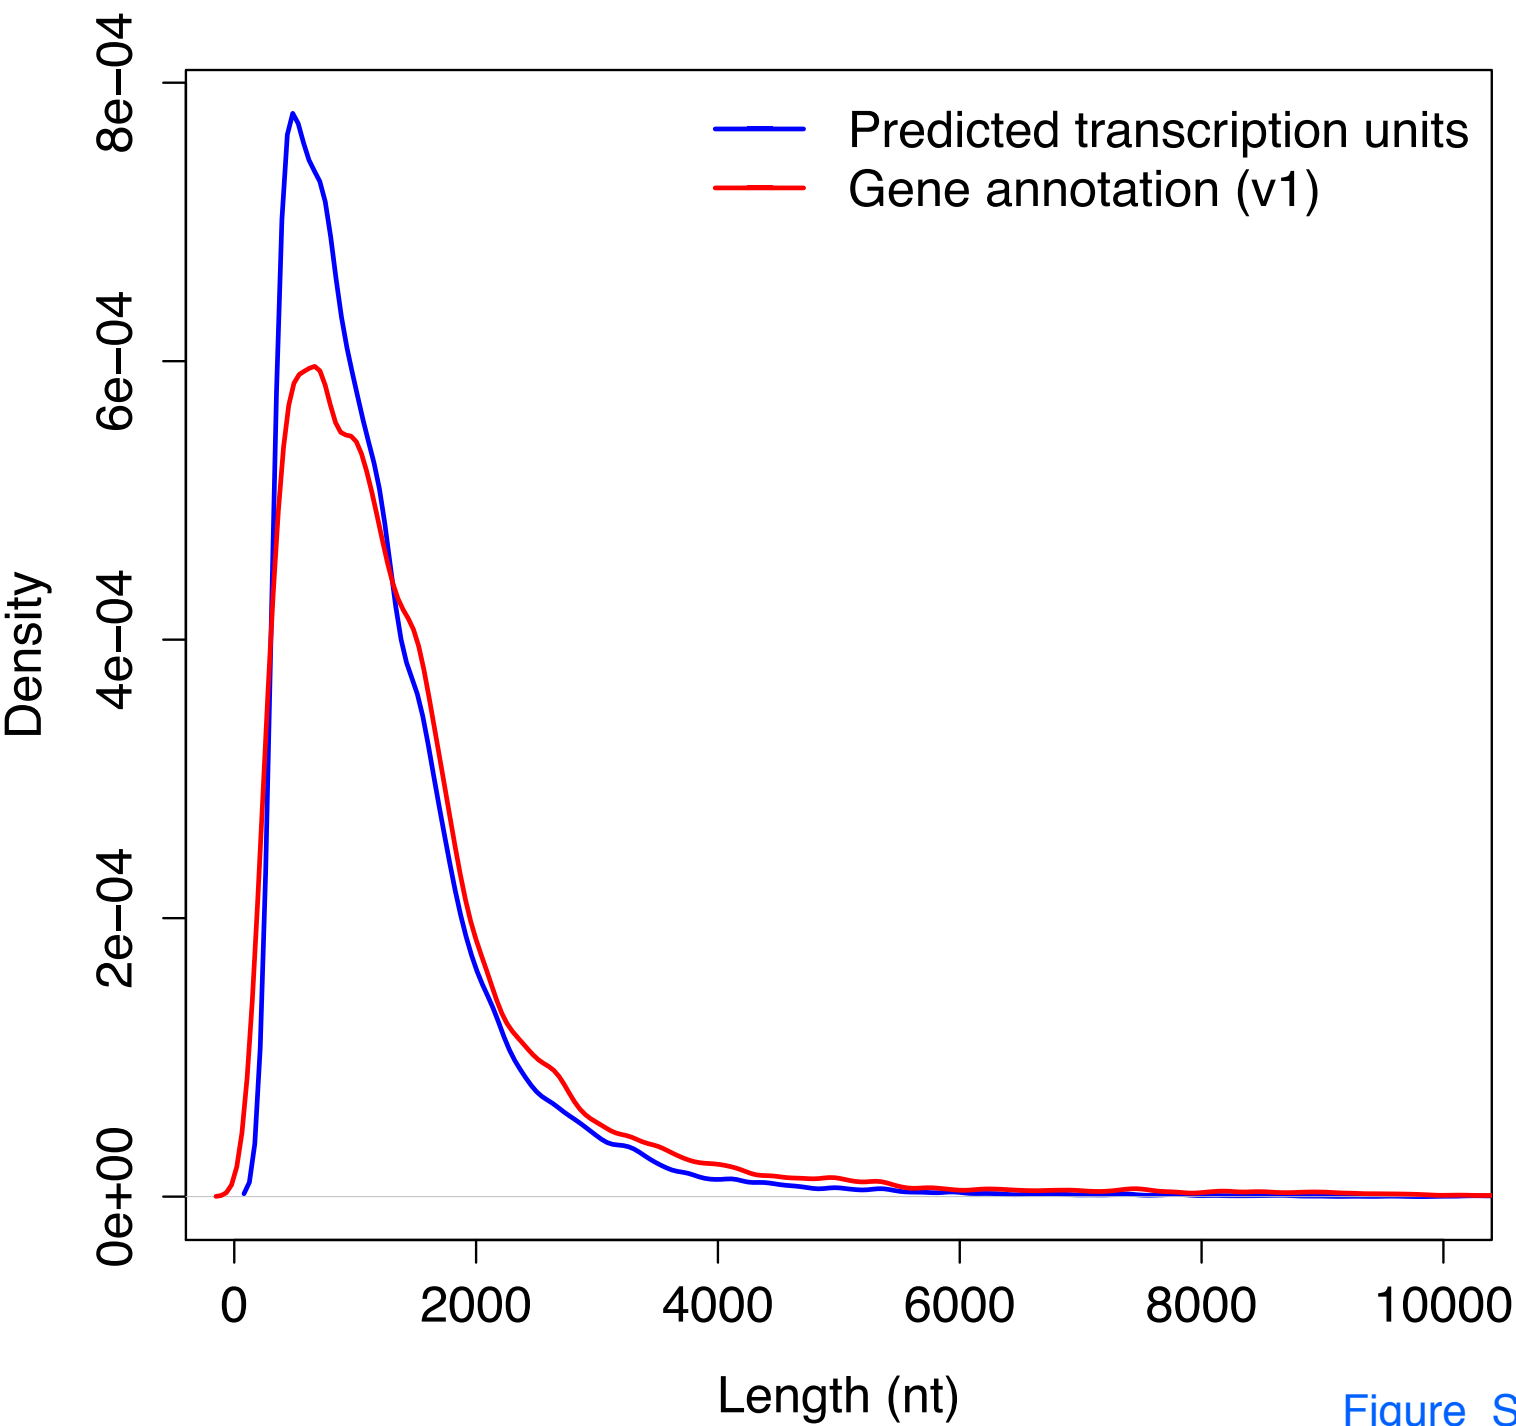

Figure S1

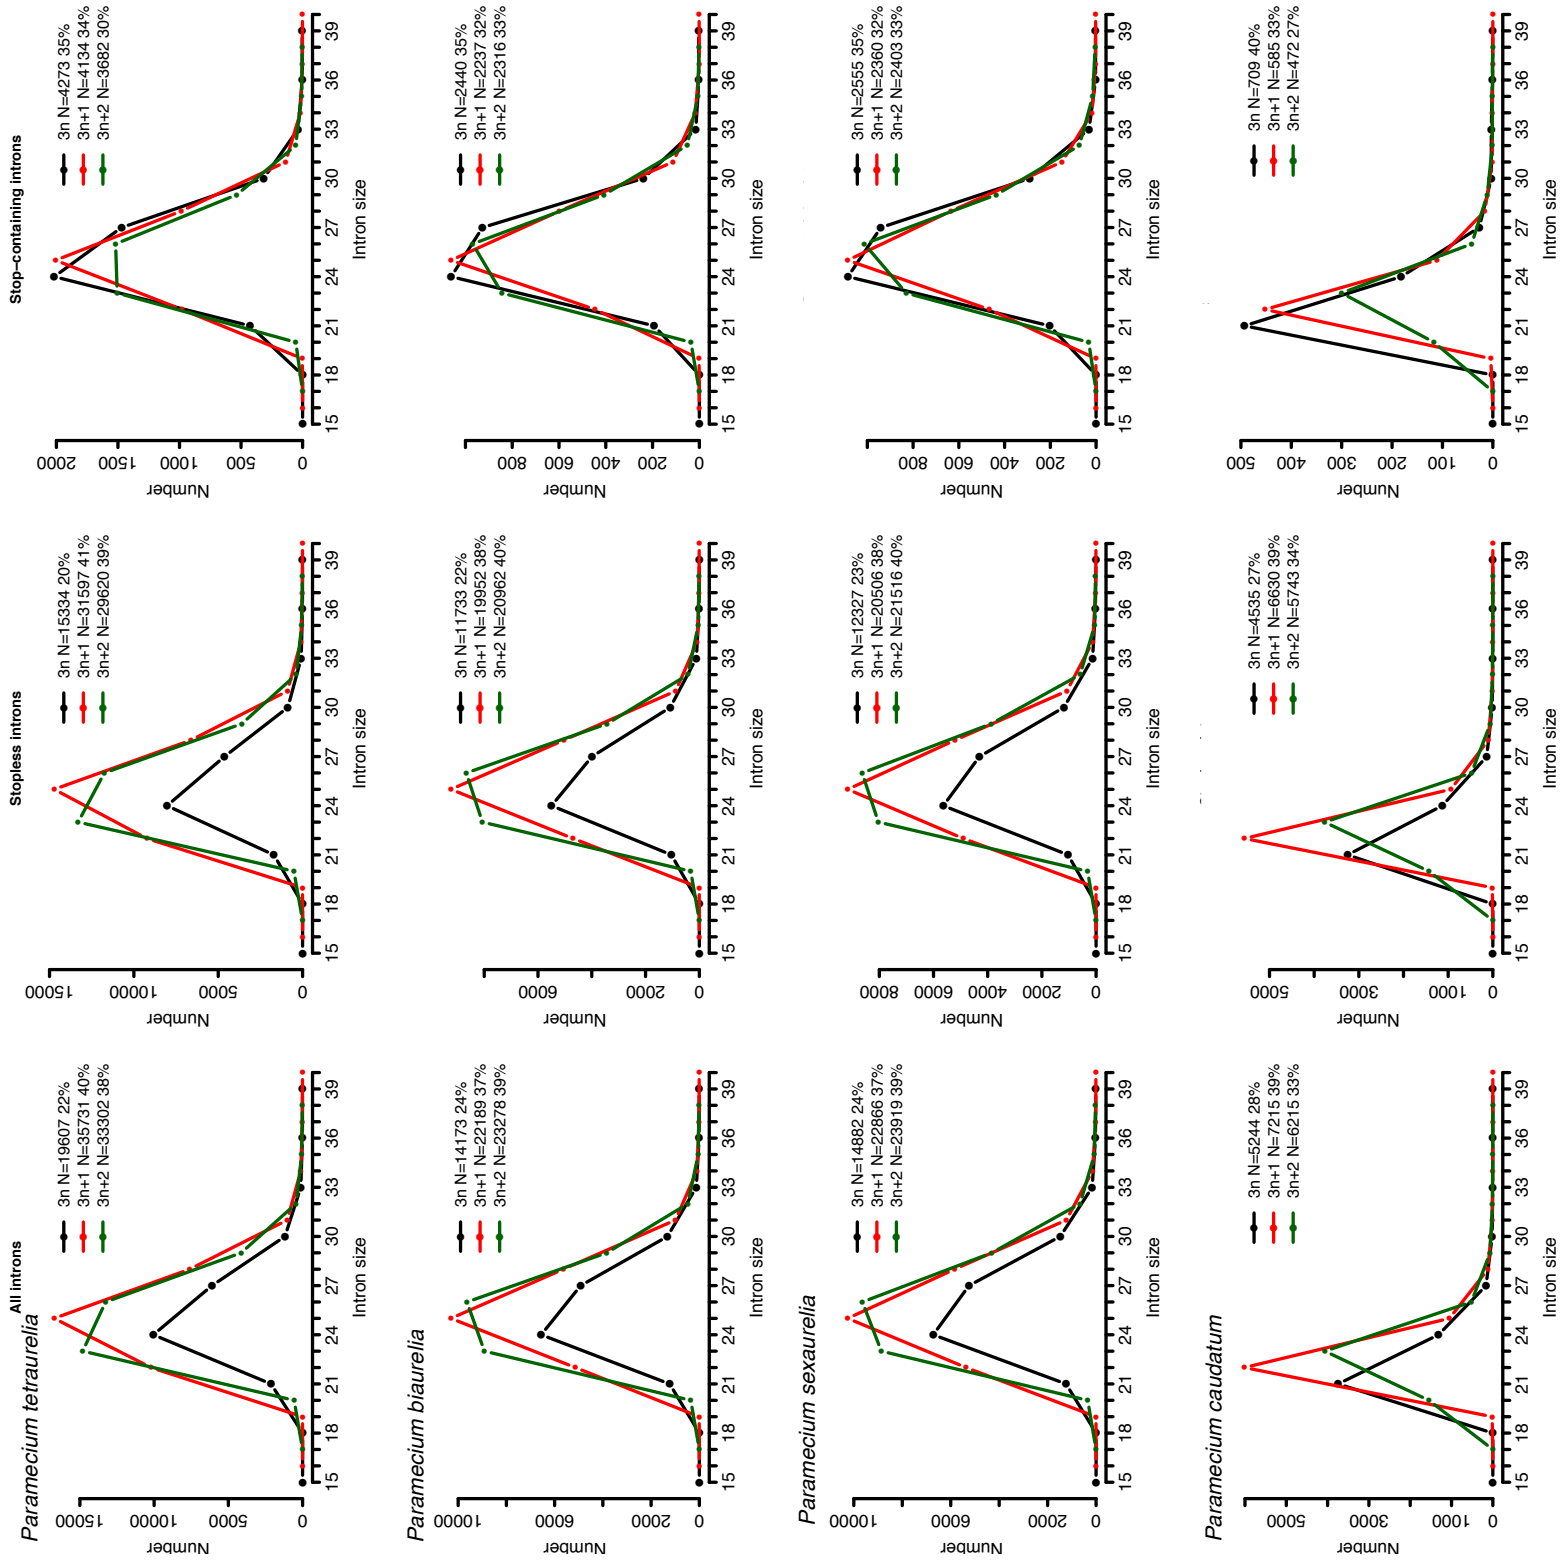

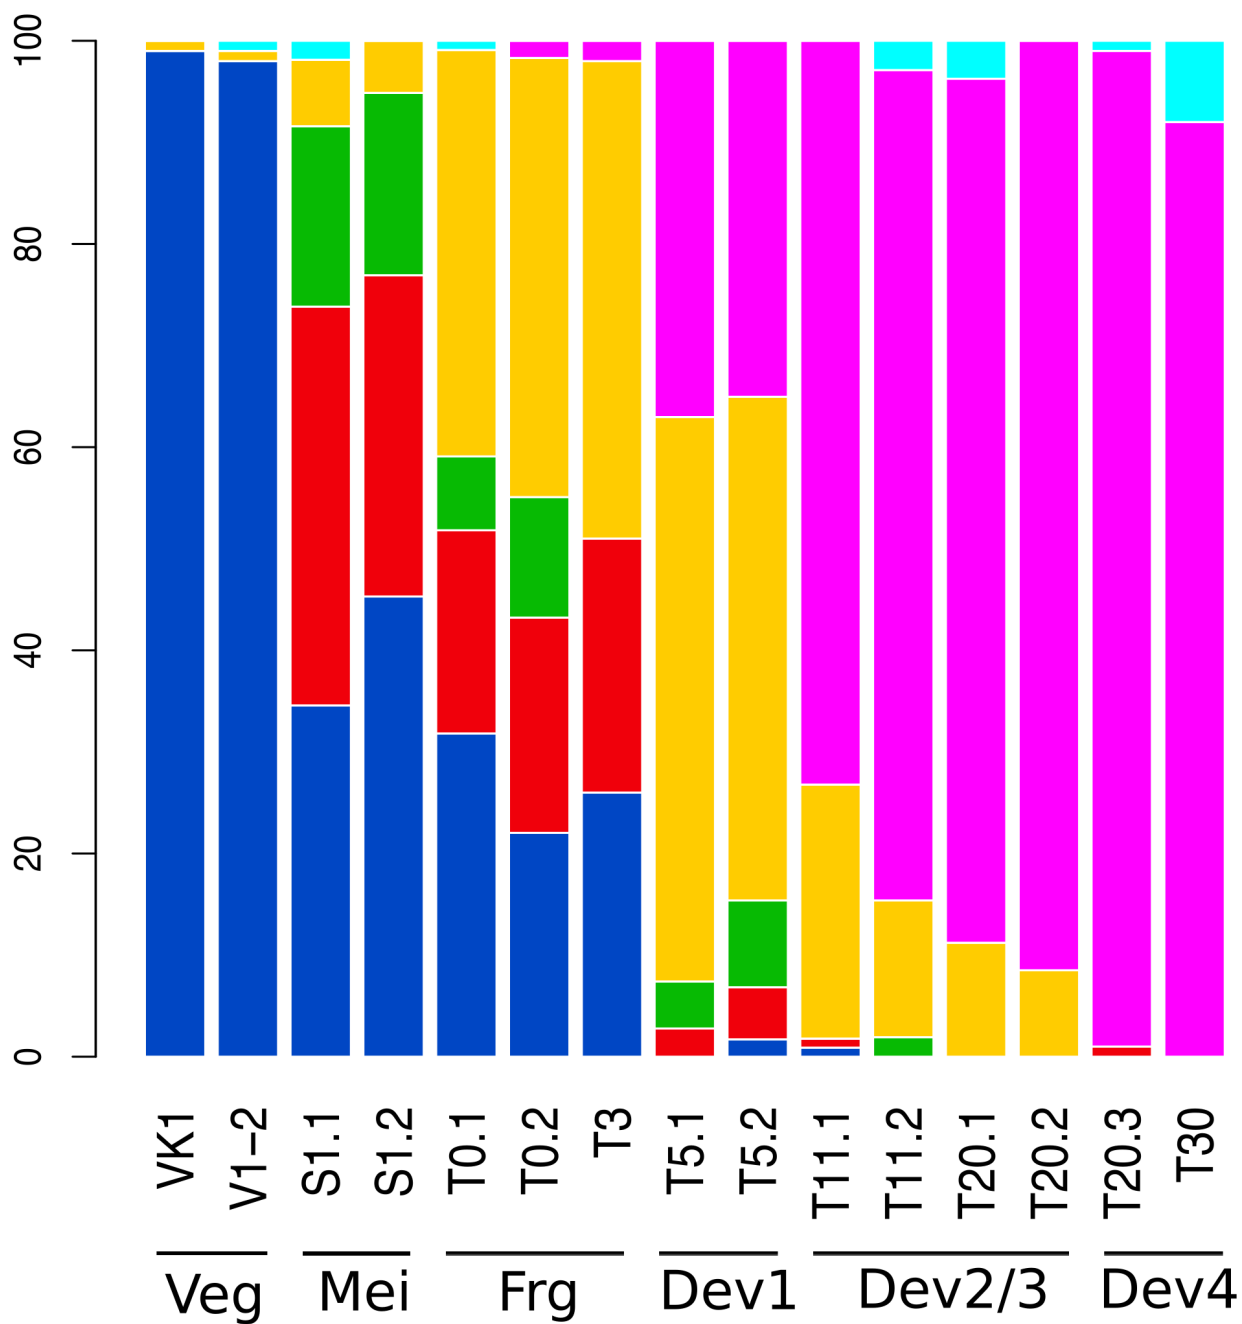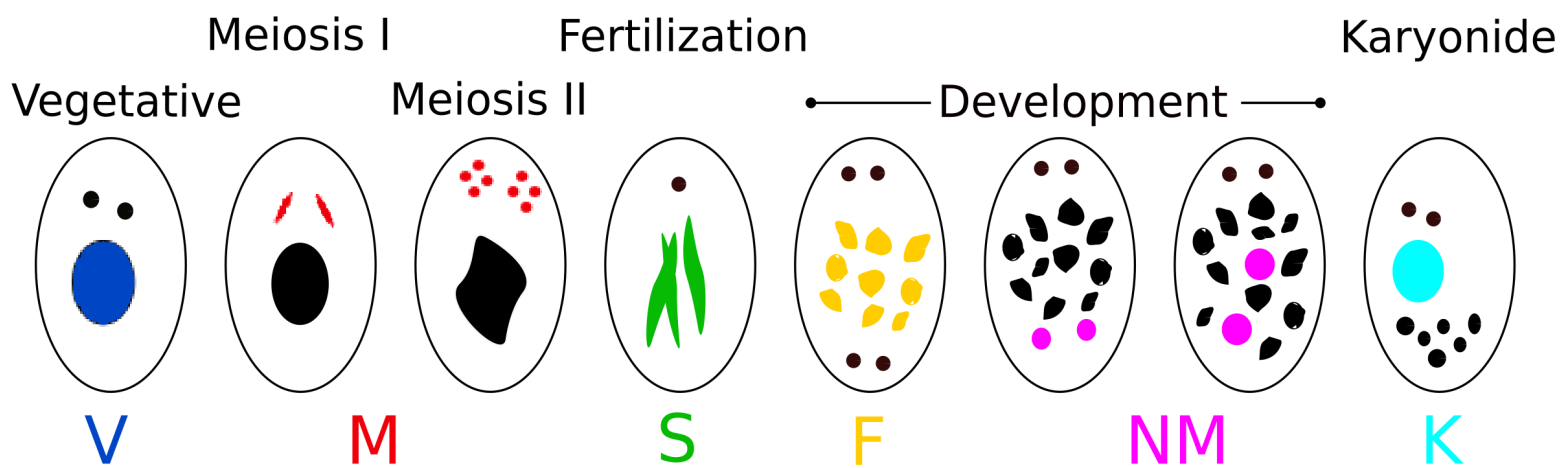

Figure S3

**A**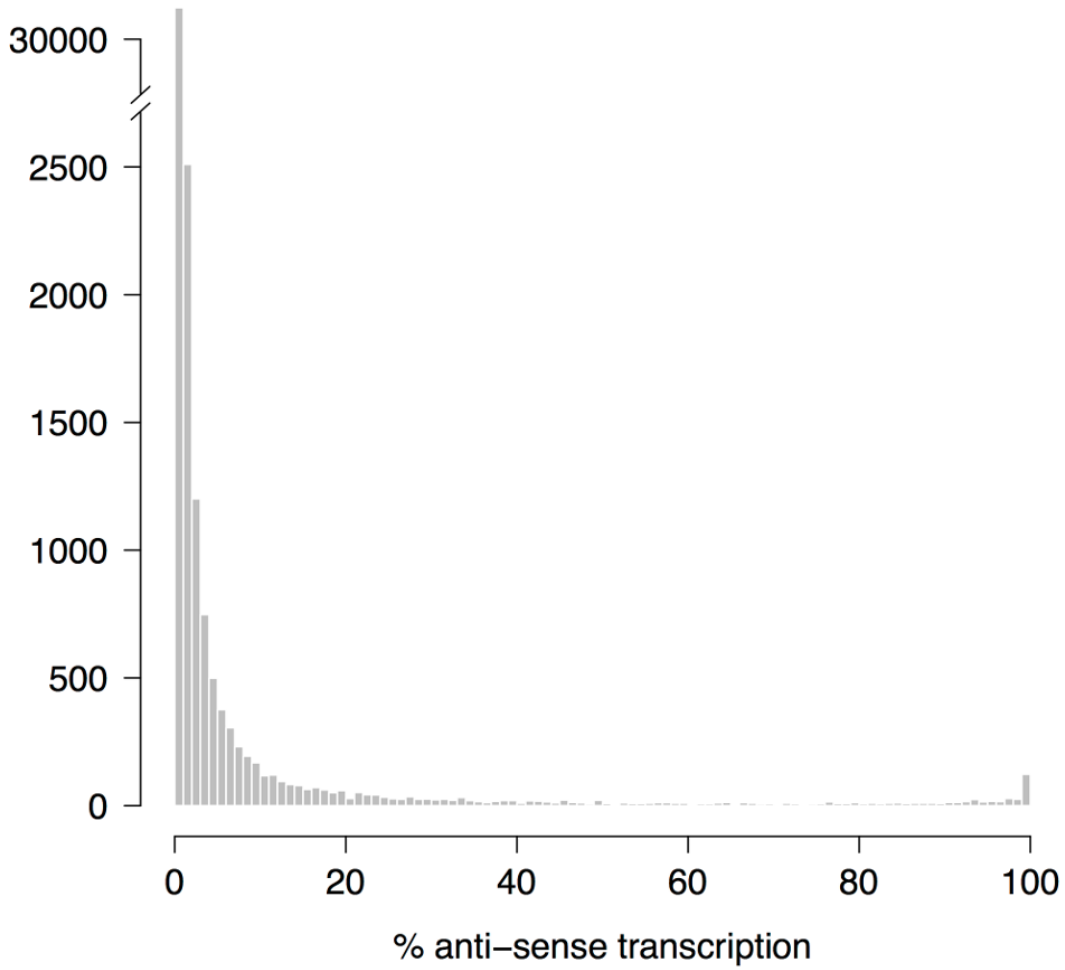**B**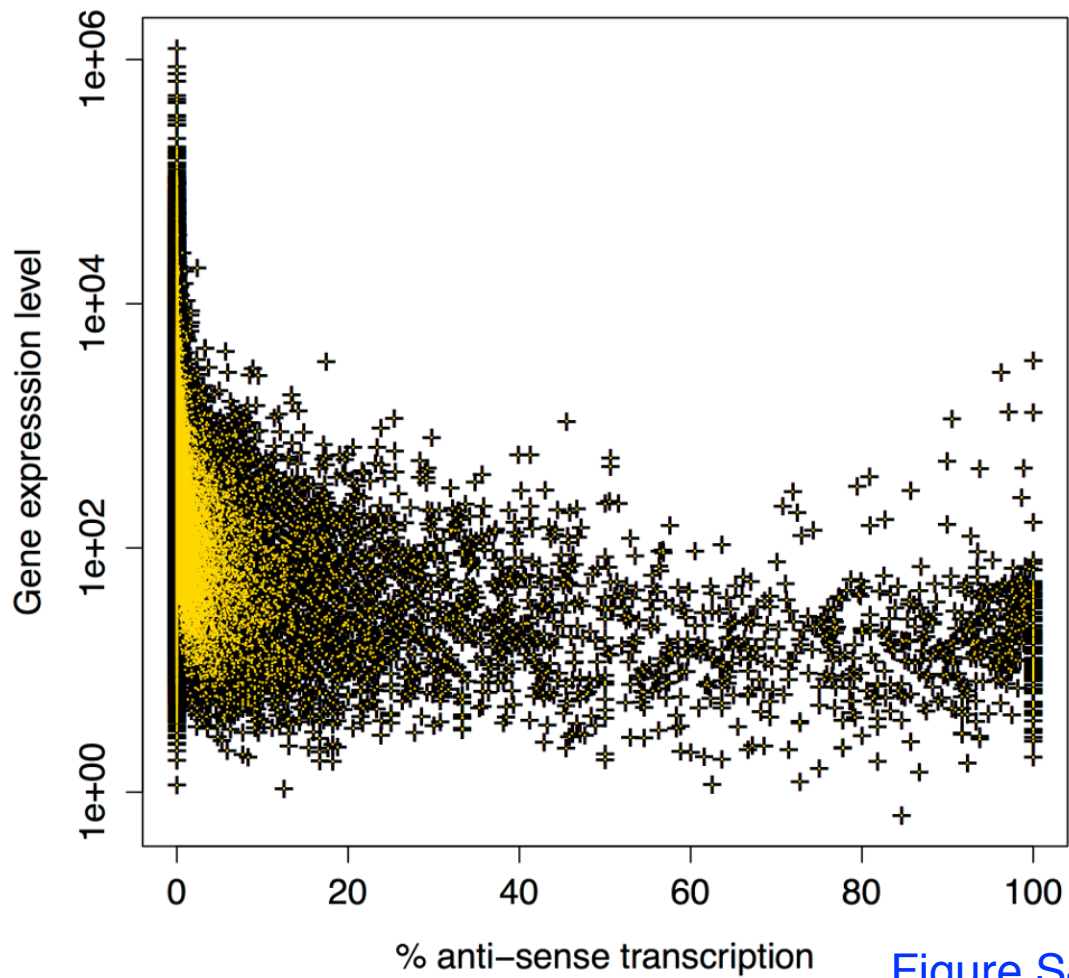

Figure S4

**a**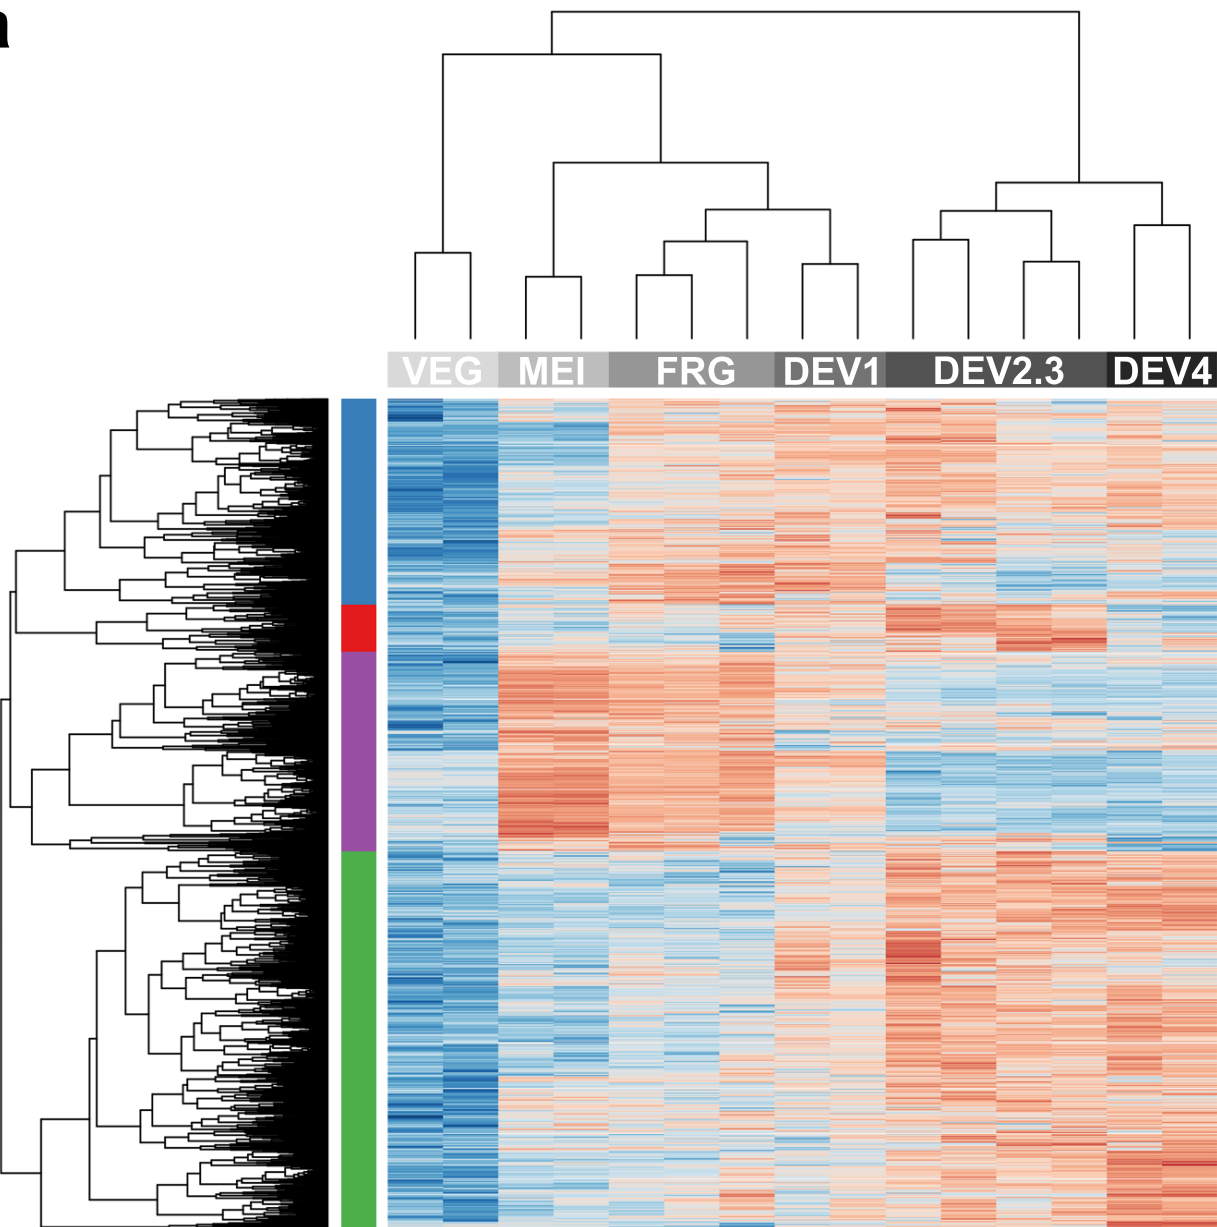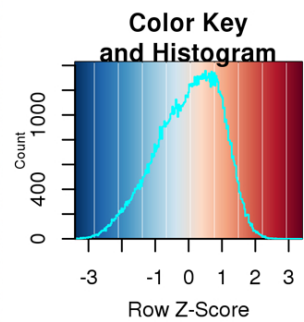**b**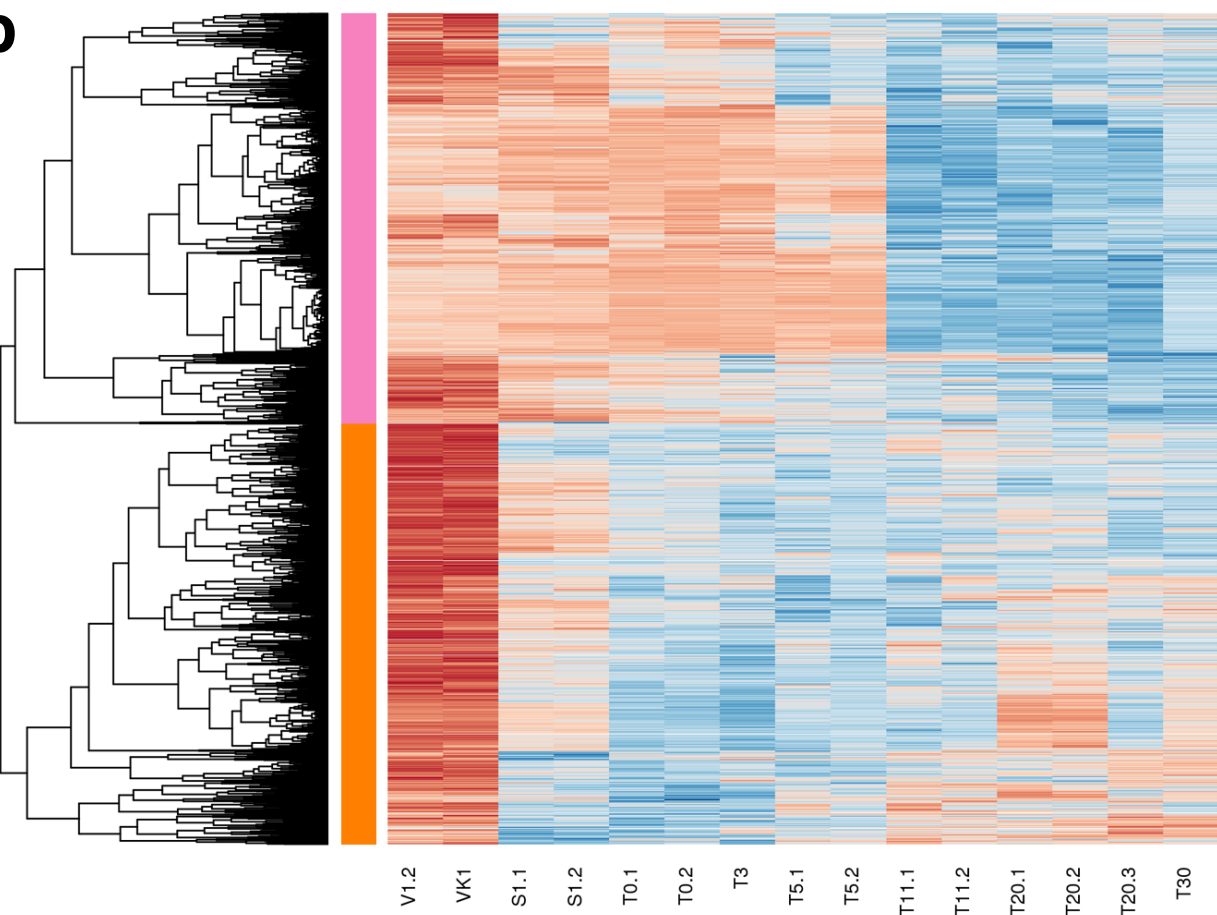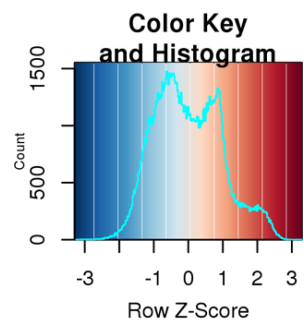**Figure S5**

Early peak (N=1974)

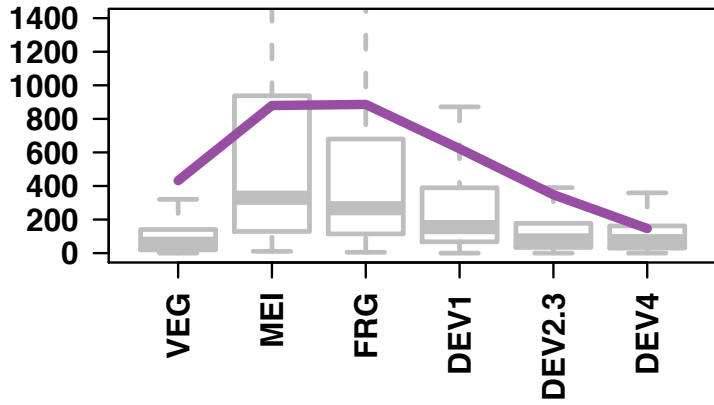

Intermediate peak (N=2037)

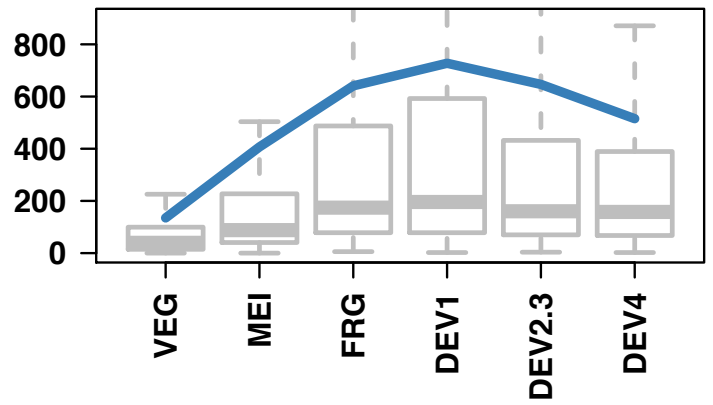

Late peak (N=468)

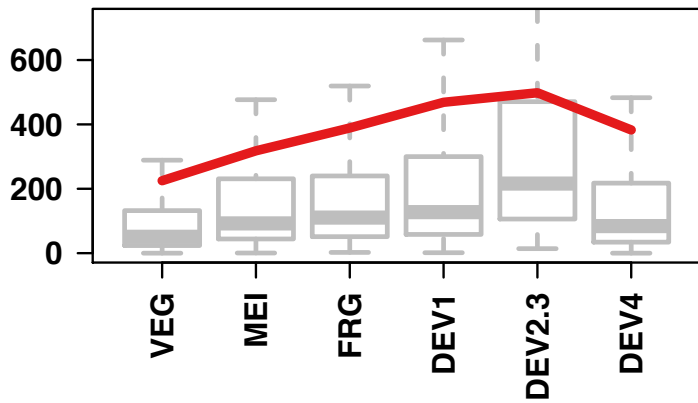

Late induction (N=3741)

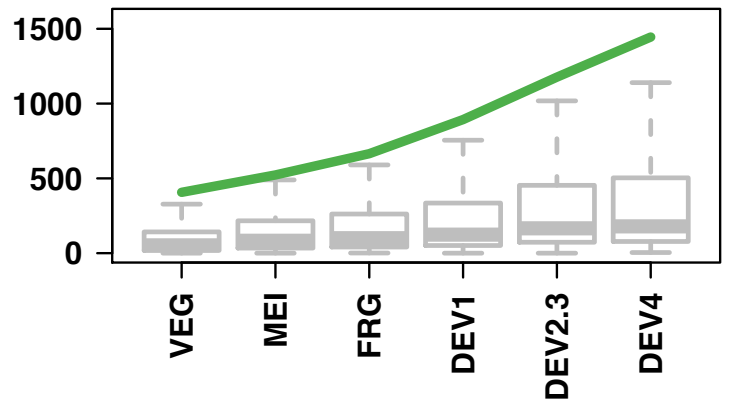

Early repression (N=4536)

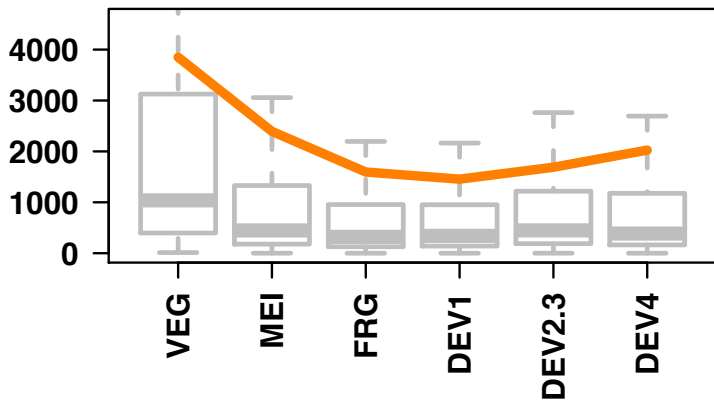

Late repression (N=4434)

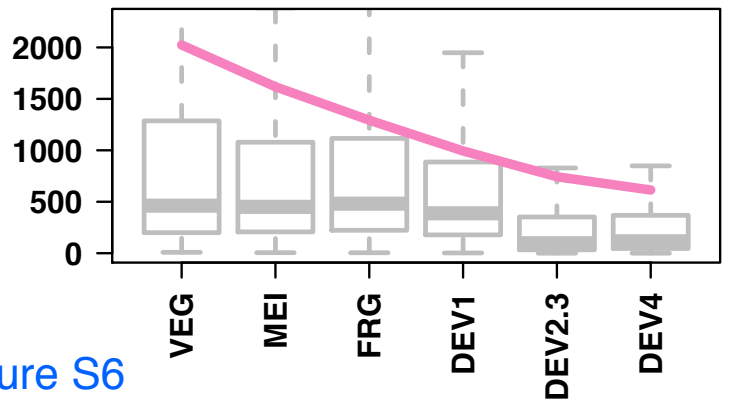

Figure S6

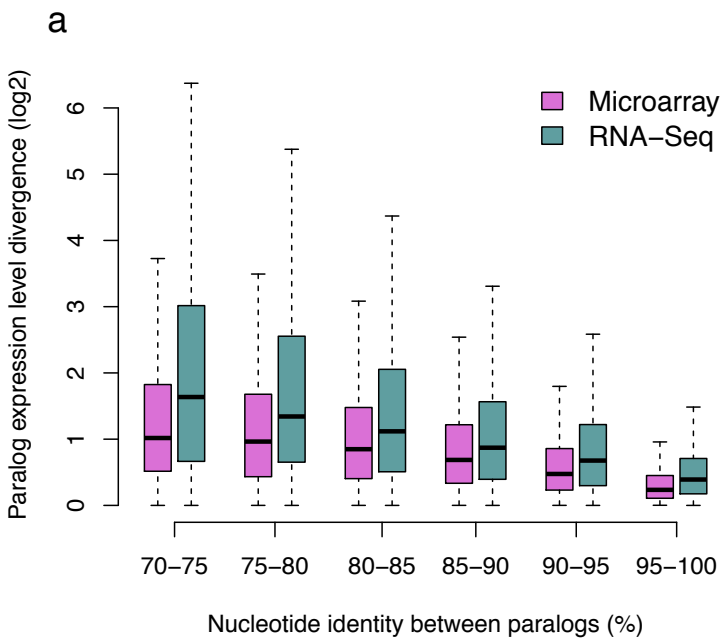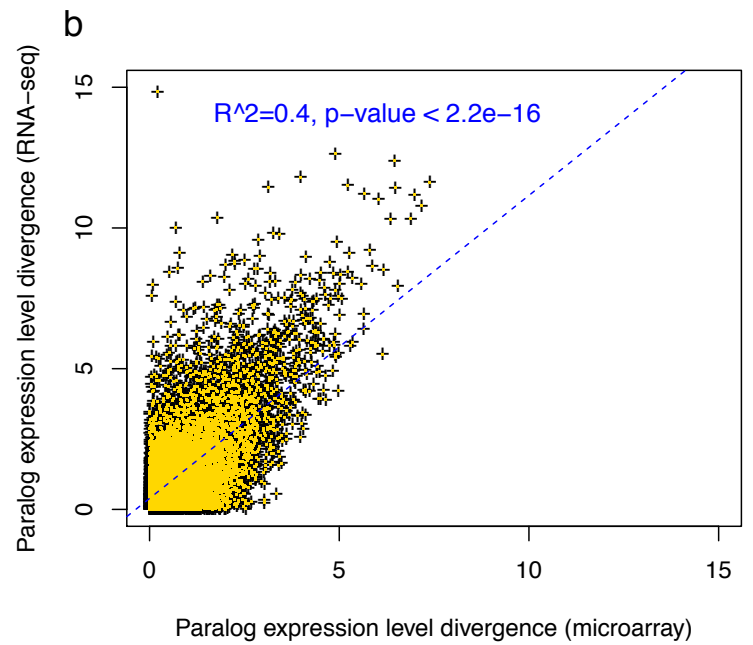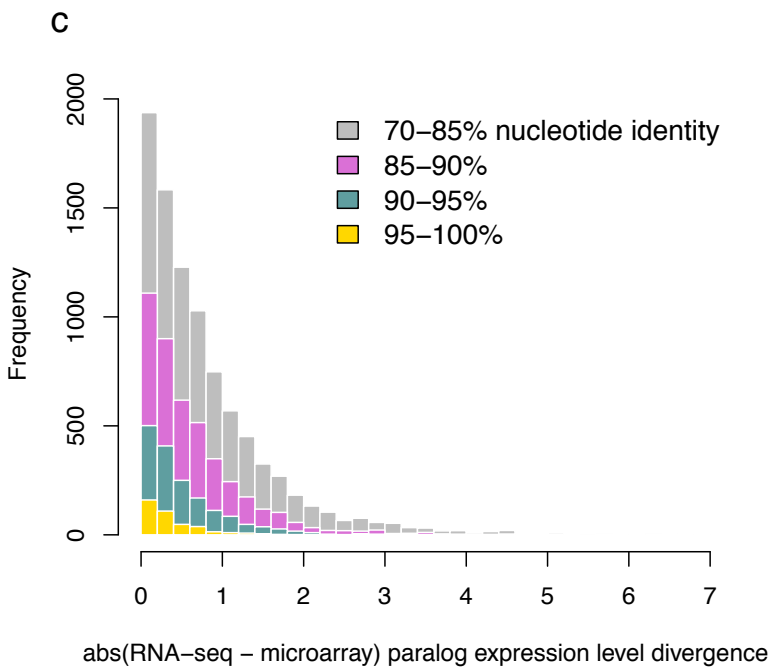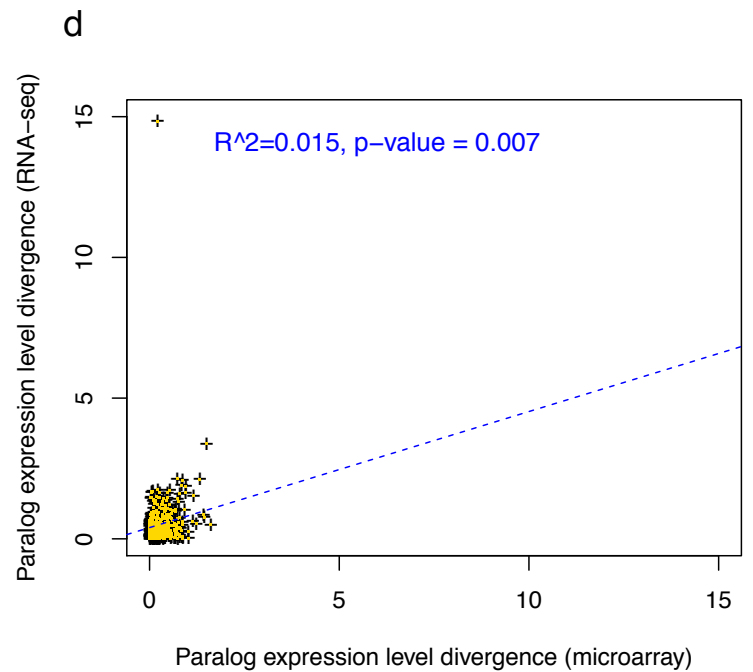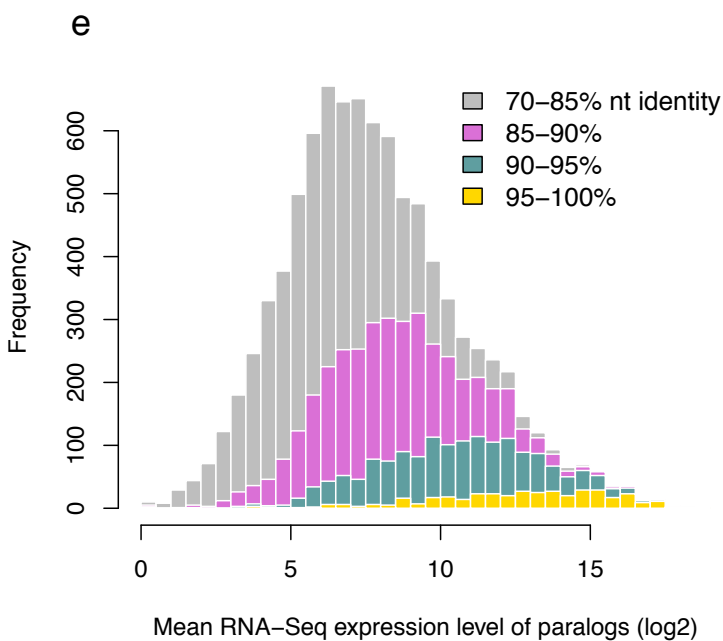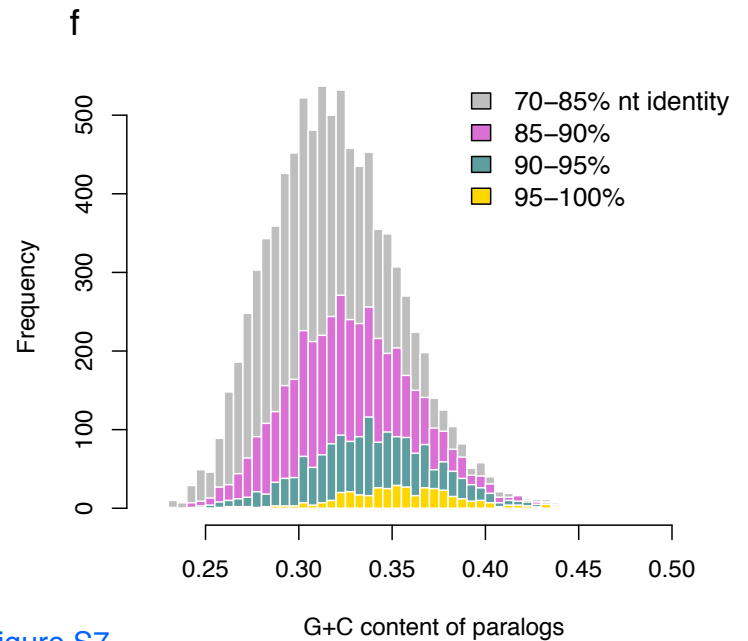

Figure S7

**a**

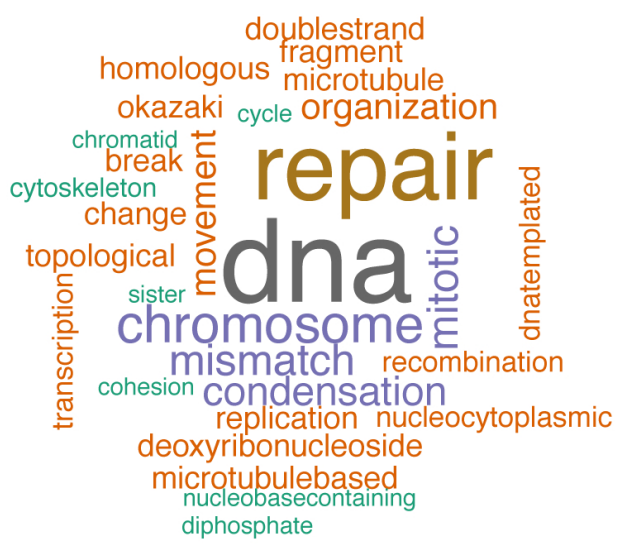

**b**

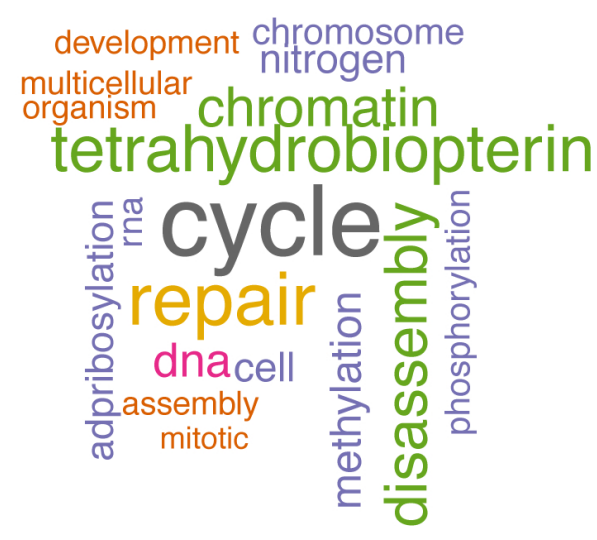

**c**

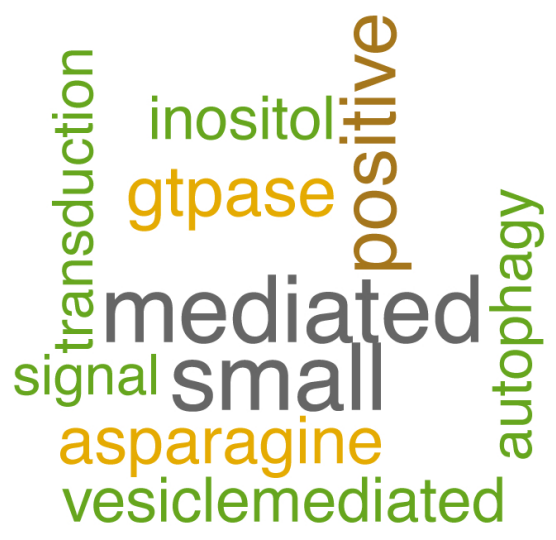

**d**

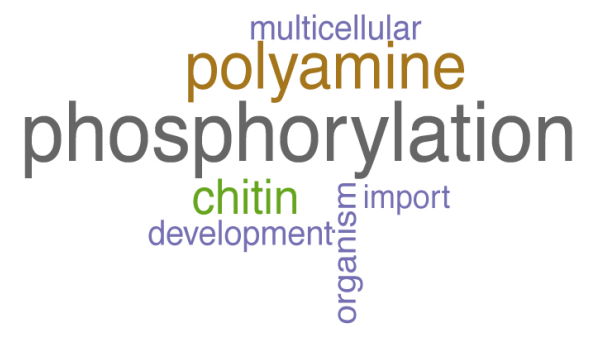

**e**

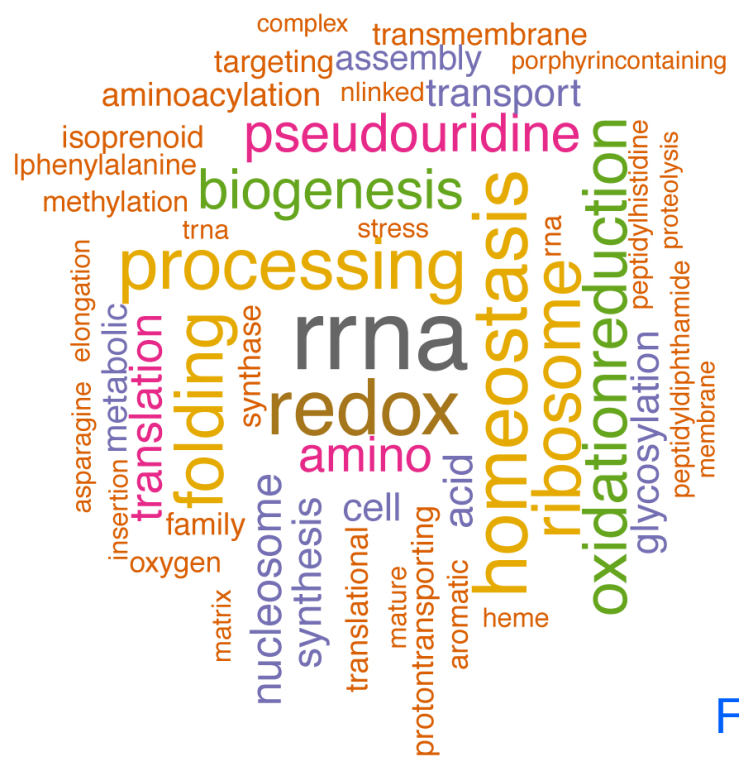

**f**

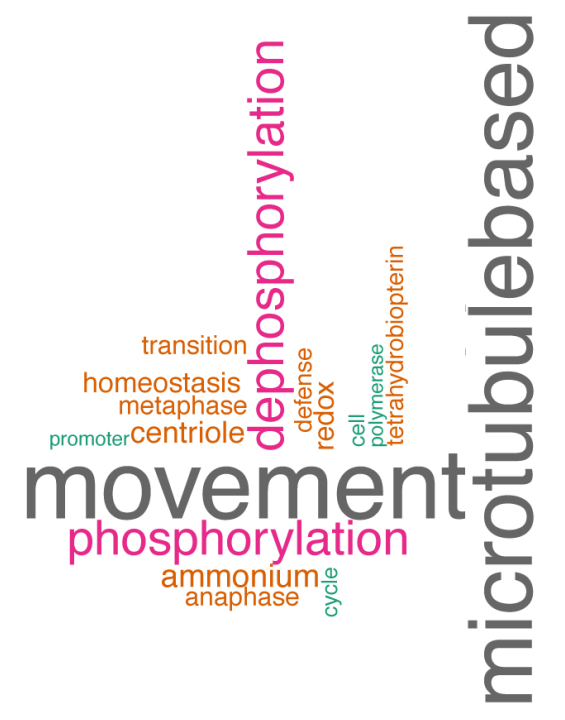

Figure S8
